# Supplementary material for: The Optimized γ-Globin Lentiviral Vector GGHI-mB-3D Leads to Nearly Therapeutic HbF Levels In Vitro in CD34+ Cells from Sickle Cell Disease Patients
Source: MDPI journal article supplement (doi:10.3390/v14122716), 2022-12-05
Supplement: s1 [file s1]

Supplementary Figures

1

**A**

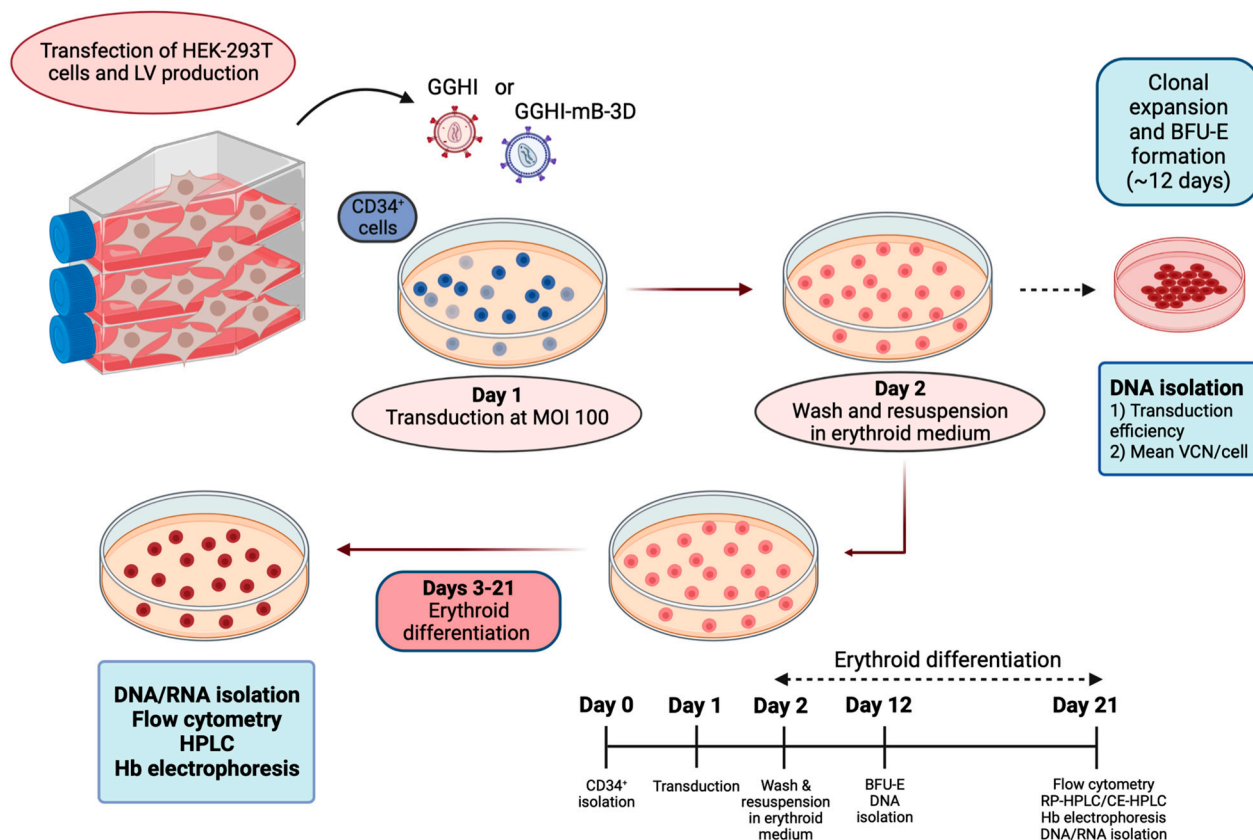

**B**

|       | GGHI     | GGHI-mB-3D |
|-------|----------|------------|
| LOT 1 | 3.7e+008 | 6.95e+007  |
| LOT 2 | 1.0e+008 | 2.60e+008  |
| LOT 3 | 2.2e+008 | 1.20e+008  |
| LOT 4 | 1.2e+008 | 1.60e+008  |
| LOT 5 | 1.1e+008 | 1.70e+008  |
| LOT 6 | 6.0e+007 |            |

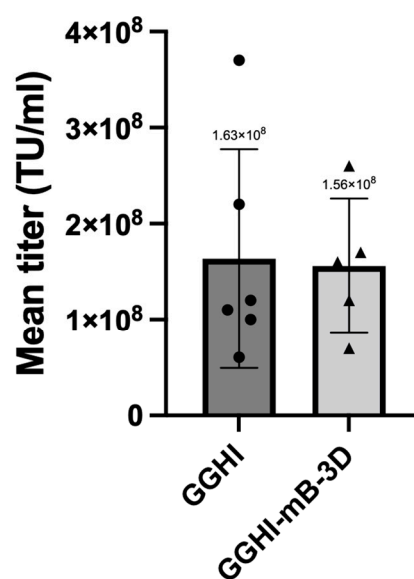

2

**Figure S1.** (A) Schematic representation of the experimental procedure, created with Biorender.com (accessed on 11 November 2022) 3  
(B) Table showing corresponding titers (TU/mL) of different virus batches (LOTs) for GGHI ( $n = 6$ ) and GGHI-mB-3D ( $n = 5$ )  $\gamma$ -globin 4  
lentiviral vectors (left panel) and bar chart showing mean GGHI and GGHI-mB-3D titers ( $p = 0.902$ , unpaired two-tailed  $t$ -test) (right 5  
panel). Error bars represent  $\pm$ SD. 6

A

$\beta^S\beta^S$

|           | HbF | HbS  |
|-----------|-----|------|
| Patient 4 | 5.4 | 87.3 |
| Patient 5 | 7.9 | 83.7 |
| Patient 6 | 2.0 | 91.4 |
| Patient 7 | 9.2 | 85.4 |
| Patient 8 | 6.9 | 85.7 |

$\beta^S\beta^+$

|            | HbF  | HbS  |
|------------|------|------|
| Patient 9  | 4.5  | 79.6 |
| Patient 10 | 5.5  | 81.2 |
| Patient 11 | 4.6  | 80.0 |
| Patient 12 | 5.3  | 75.2 |
| Patient 13 | 16.0 | 69.6 |

B

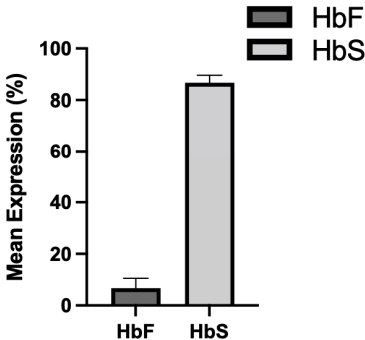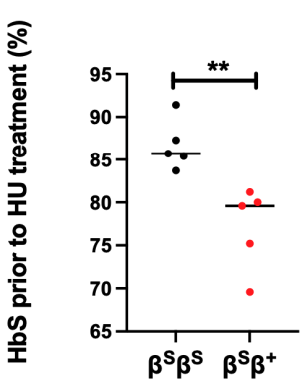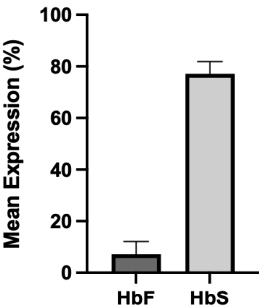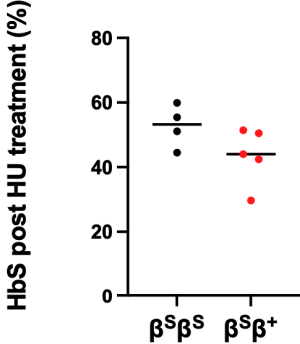

C

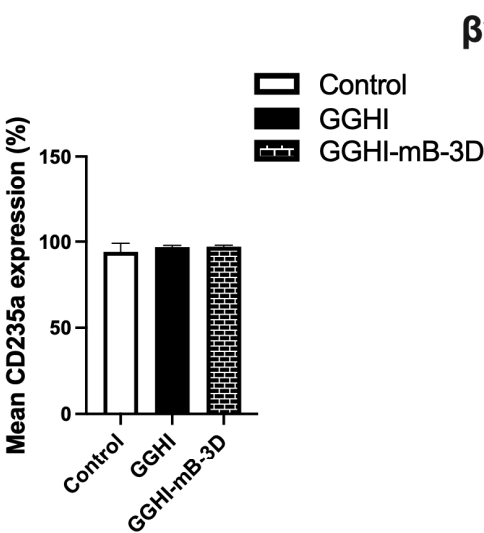

|           | Control | GGHI | GGHI-mB-3D |
|-----------|---------|------|------------|
| Patient 4 | 97.7    | 97.3 | 98.4       |
| Patient 5 | 96.5    | 96.6 | 96.3       |
| Patient 6 | 87.2    | 97.4 | 96.8       |
| Patient 7 | 98.4    | 97.6 | 97.4       |
| Patient 8 | 90.8    | 95.1 | 96.3       |

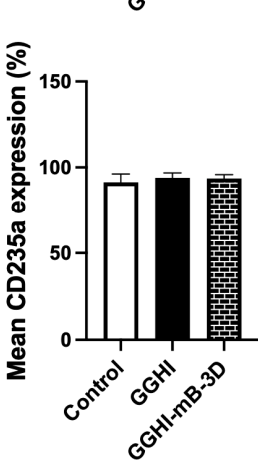

|            | Control | GGHI | GGHI-mB-3D |
|------------|---------|------|------------|
| Patient 9  | 98.2    | 98.5 | 97.3       |
| Patient 10 | 91.6    | 91.8 | 90.9       |
| Patient 11 | 93.4    | 93.3 | 92.9       |
| Patient 12 | 87.2    | 91.2 | 92.9       |
| Patient 13 | 85.9    | 94.7 | 93.6       |

**Figure S2. (A)** Baseline HbF and HbS expression prior to hydroxyurea (HU) treatment. The mean percentage of HbF and HbS in  $\beta^S\beta^S$  patient cohort was  $6.28 \pm 2.77\%$  and  $86.7 \pm 2.92\%$  ( $n = 5$ ) respectively (upper panel), while for  $\beta^S\beta^+$  patient cohort it reached  $7.18 \pm 4.95\%$  and  $77.12 \pm 4.78\%$  ( $n = 5$ ) respectively (lower panel) **(B)** HbS expression prior (upper panel) and post (lower panel) HU treatment in  $\beta^S\beta^S$  and  $\beta^S\beta^+$  patients. The former cohort expressed significantly higher percentage of HbS compared to  $\beta^S/\beta^+$  prior to hydroxyurea treatment ( $p = 0.0051$ ,  $n = 5$ ). There was no statistical difference between cohorts post HU treatment ( $p = 0.1274$ ,  $\beta^S\beta^S$ :  $n = 4$ ,  $\beta^S\beta^+$ :  $n = 5$ ) **(C)** CD235a expression at the end of *in vitro* differentiation (D19-D20) in  $\beta^S\beta^S$  patients (upper panel) and  $\beta^S\beta^+$  patients (lower panel). Each dot corresponds to each patient. Error bars represent  $\pm$ SD.

**A**

**Across all patients**

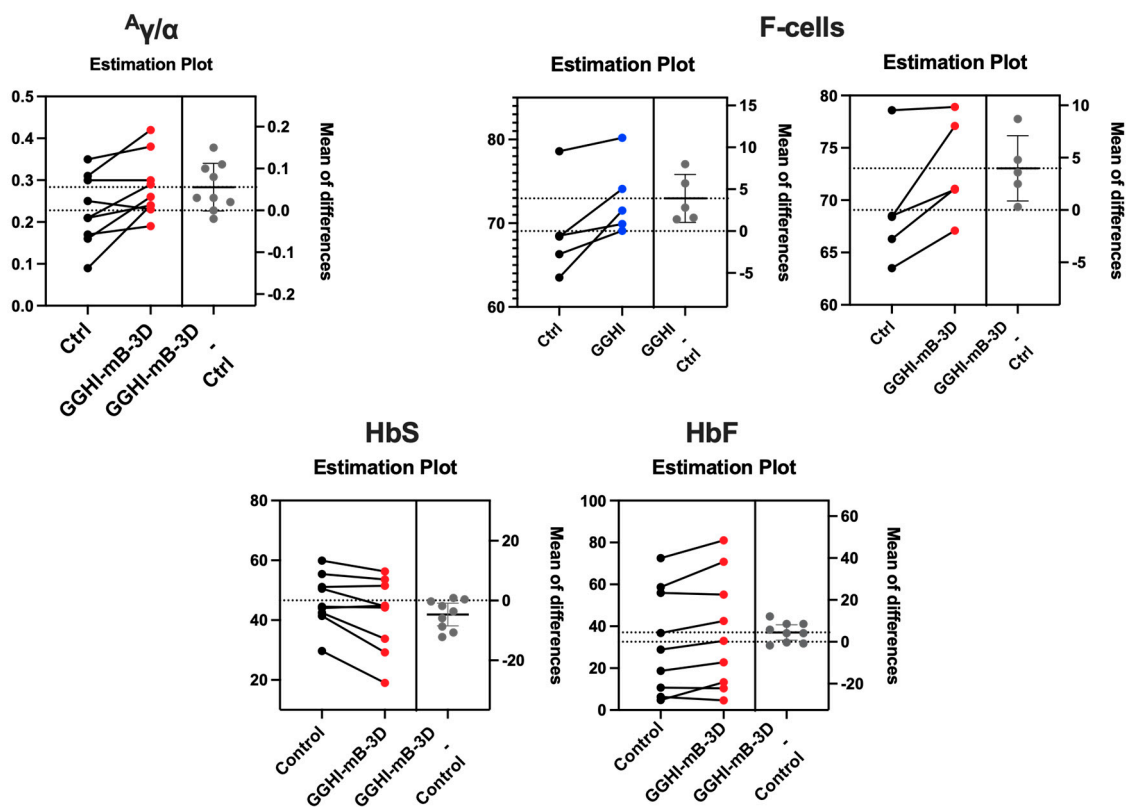

**B**

**$\beta^S\beta^+$  cohort**

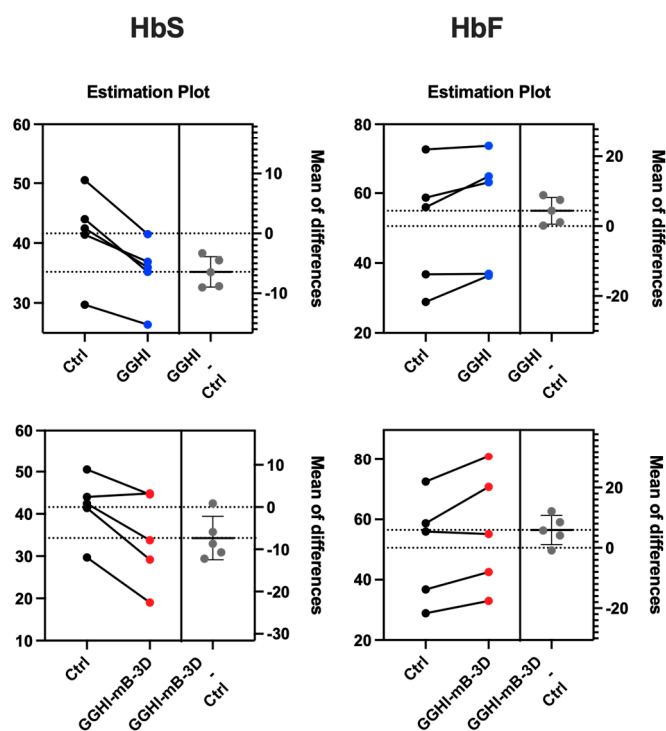

**Figure S3.** Estimation plots for all comparisons with statistical significance. Each dot corresponds to each patient.

16

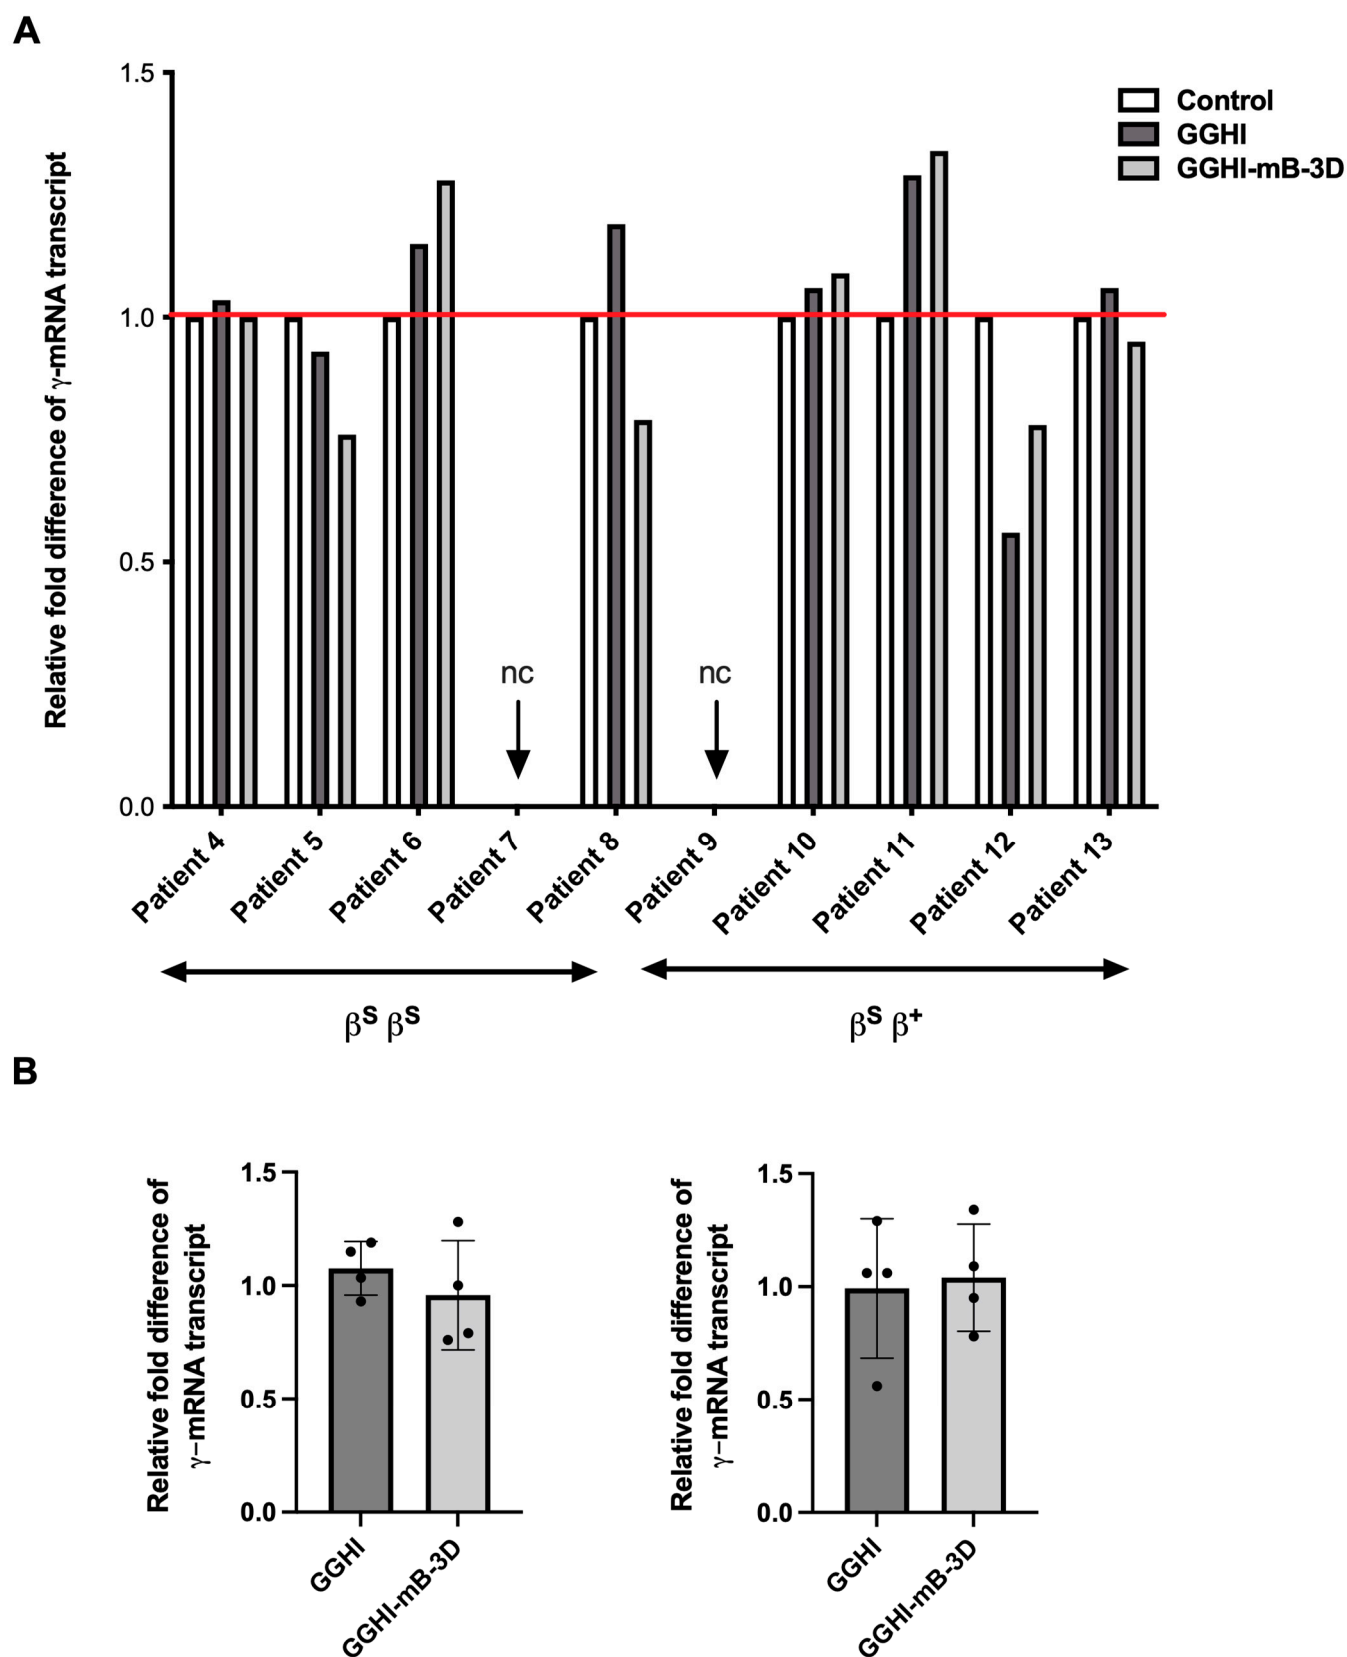**Figure S4.** Performance of  $\gamma$ -globin LVs at the RNA level (A) Bar chart showing relative fold difference of  $\gamma$ -mRNA transcripts in different patients ( $n = 8$ ) (B) Bar charts showing relative fold difference of  $\gamma$ -mRNA transcripts in the  $\beta^S \beta^S$  patient cohort ( $n = 4$ ) (left

17

18

19

panel) and in the  $\beta^S\beta^+$  patient cohort ( $n = 4$ ) (right panel). Normalization was carried out to  $\alpha$ -globin gene. Each dot corresponds to each patient. Error bars represent  $\pm$ SD.

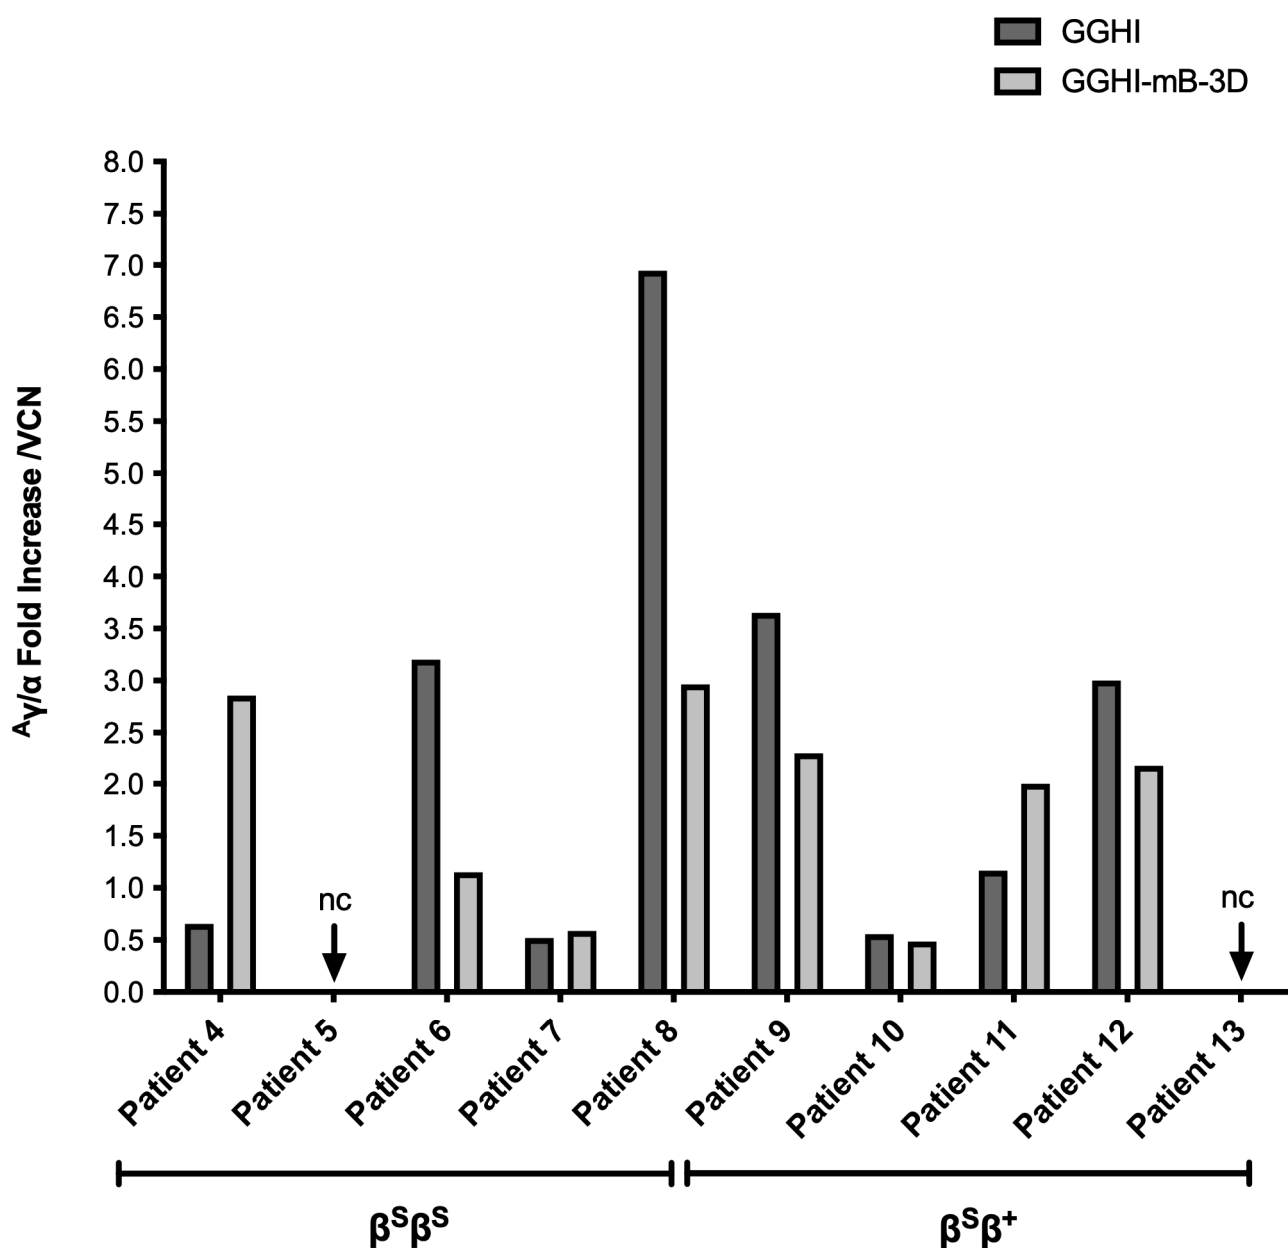

**Figure S5.**  $A\gamma/\alpha$  ratio fold increase per patient post-transduction with GGHI and GGHI-mB-3D lentiviral vectors and following normalization to mean VCN/cell. nc: not conducted due to limited number of cells.
